# Supplementary material for: The polysaccharides from the Grifola frondosa fruiting body prevent lipopolysaccharide/d-galactosamine-induced acute liver injury via the miR-122-Nrf2/ARE pathways
Source: Royal Society of Chemistry journal article supplement (doi:10.1039/d0fo03327h), 2021-01-01

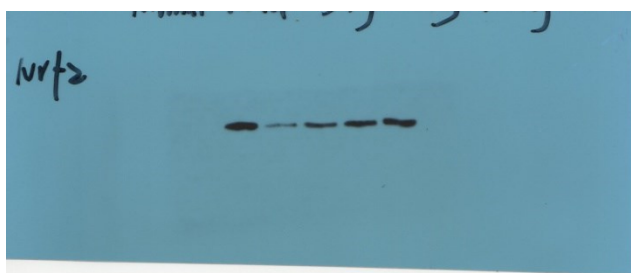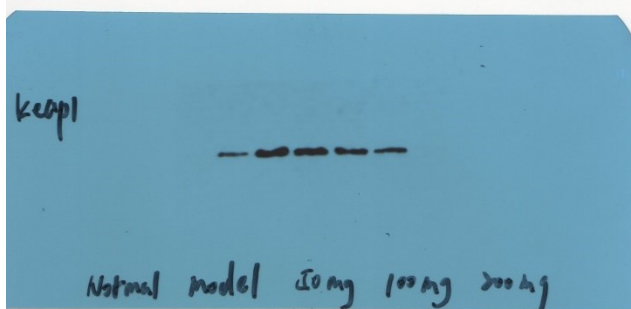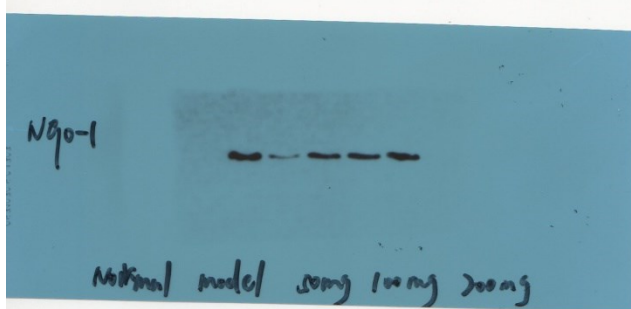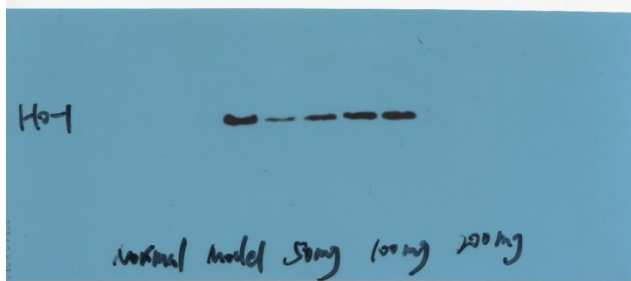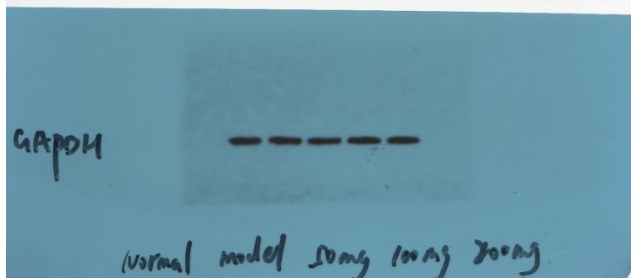

NVf2

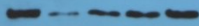

Normal model 50mg 100mg 200mg

keap1

Normal model 50mg 100mg 200mg

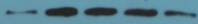

Nqo-1

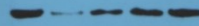

Normal model 50mg 100mg 200mg

Hsp

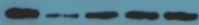

Normal model 50mg 100mg 200mg

GAPDH

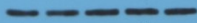

Normal model 50mg 100mg 200mg

Nrf2

-----

Normal model song 100mg 200mg

Keap1

-----

Normal model song 100mg 200mg

Nrf1

-----

Normal model song 100mg 200mg

Hnf1

-----

Normal model song 100mg 200mg

Normal model song 100mg 200mg

cAMP

-----

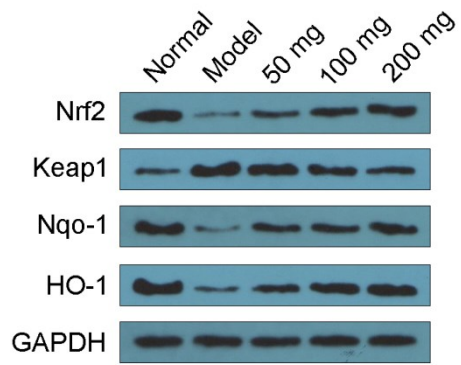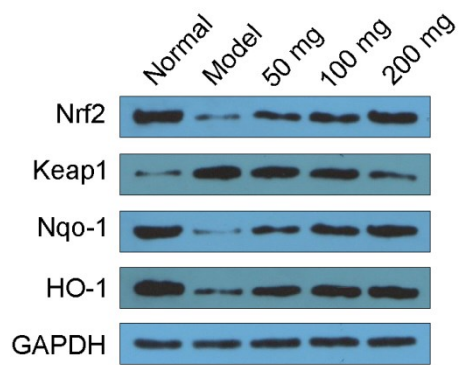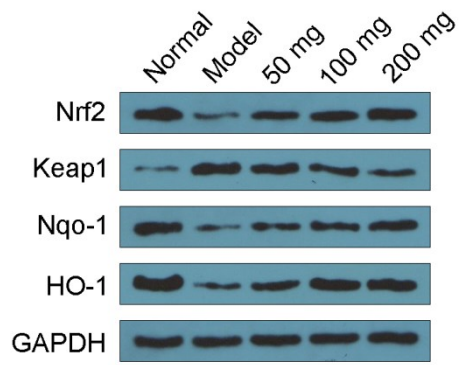

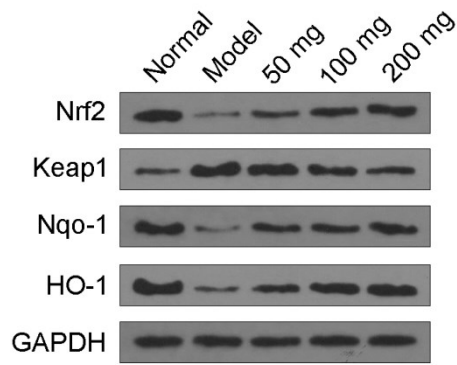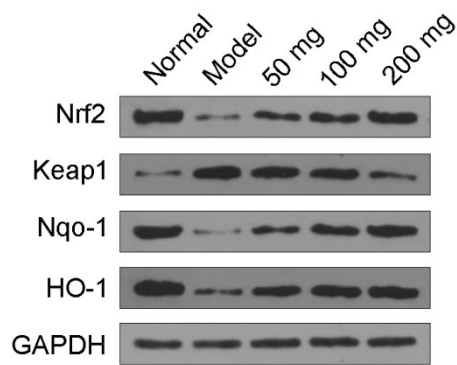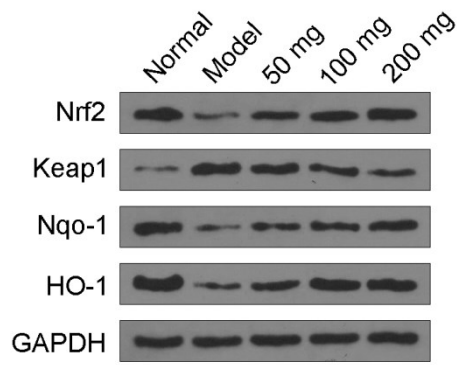

Supplement: d0fo03327h1.pdf [file d0fo03327h1.pdf]
